# Supplementary material for: A Cross-Sectional Study of Hepatitis B and Hepatitis C Knowledge Among Dental Medicine Students at the University of Zagreb
Source: Preprints.org preprint supplement (doi:10.20944/preprints202004.0324.v1), 2020-04-19
Supplement: Supplementary file 1 [file supplementary]

**Supplementary material:**

- **HBV-related Knowledge Questionnaire**
- **HBV-related Knowledge Questionnaire With Answers**
- **HCV-related Knowledge Questionnaire**
- **HCV-related Knowledge Questionnaire With Answers**
- **Supplementary material 1 (Factor Analysis of Categorical and Qualitative Variables )**

**HBV-related Knowledge Questionnaire**

**A person with no symptoms of HBV infection cannot infect others.**

- True
- False
- I do not know

**There is no laboratory test to distinguish between an acute and chronic HBV infection.**

- True
- False
- I do not know

**If a pregnant woman becomes infected with HBV, it is not possible to prevent the transmission of the virus to the baby.**

- True
- False
- I do not know

**The symptoms of the disease usually develop 48 hours after the exposure to HBV.**

- True
- False
- I do not know

**HBV cannot induce malignant liver disease.**

- True
- False
- I do not know

**HBV can be transmitted through a contact (for example, by handshake).**

- True
- False
- I do not know

**HBV can be transmitted through contact with open wounds and cuts.**

**Homolak J et al. (2020) A cross-sectional study of Hepatitis B and Hepatitis C knowledge among dental medicine students at the University of Zagreb - Supplementary Material**

True  
False  
I do not know

**HBV can be transmitted through infected blood and bodily fluids.**

True  
False  
I do not know

**HBV cannot be transmitted through non-sterile syringes, needles or surgical instruments.**

True  
False  
I do not know

**HBV can be transmitted through sexual contact without protection.**

True  
False  
I do not know

**Vaccination cannot prevent HBV infection.**

True  
False  
I do not know

**There is no laboratory test to prove HBV infection.**

True  
False  
I do not know

**A post-exposure prophylaxis for HBV exists.**

True  
False  
I do not know

**Chronic HBV infection cannot be treated.**

True  
False  
I do not know

**Acute HBV infection is always symptomatic and requires a hospital admission.**

True  
False  
I do not know

**An acute HBV infection always transforms into a chronic infection.**

- True
- False
- I do not know

**Younger people are more likely to develop chronic HBV infection after an acute HBV infection, in comparison to older people.**

- True
- False
- I do not know

**HBV infection in the first year of life will result in chronic infection in approximately 90% of cases.**

- True
- False
- I do not know

**HBV infection in adulthood will result in the development of chronic infection in about 90% of cases.**

- True
- False
- I do not know

**HBV can be contracted by using a toothbrush of a person infected with HBV.**

- True
- False
- I do not know

**HBV is often transmitted by breastfeeding.**

- True
- False
- I do not know

**It is possible to contract HBV by hugging.**

- True
- False
- I do not know

**People living with those infected with HBV are at an increased risk of an infection.**

- True
- False
- I do not know

**Health care professionals are at greater risk of HBV infection.**

- True
- False
- I do not know

**In case of exposure to HBV, it is possible to prevent the development of the infection by vaccination within 24 hours.**

- True
- False
- I do not know

**Once recovered from HBV infection, a person cannot get infected again.**

- True
- False
- I do not know

**There is no effective way to prevent HBV.**

- True
- False
- I do not know

**A vaccine for HBV still doesn't exist.**

- True
- False
- I do not know

**It is dangerous to receive HBV vaccine if someone has been vaccinated previously.**

- True
- False
- I do not know

**After exposure to HBV, a post-exposure prophylaxis can be provided by vaccination or by administration of hepatitis B immunoglobulin.**

- True
- False
- I do not know

**Health care professionals should be tested to determine if they have sufficient immunity to HBV.**

- True
- False
- I do not know

Homolak J et al. (2020) A cross-sectional study of Hepatitis B and Hepatitis C knowledge among dental medicine students at the University of Zagreb - Supplementary Material

**If insufficient immunity in adulthood has been determined, it is not possible to receive an additional dose of vaccine to develop immunity.**

True  
False  
I do not know

**HBV vaccine cannot be received at the same time as other vaccines.**

True  
False  
I do not know

**HBV vaccine is the only way to prevent the development of infection after exposure to infected blood.**

True  
False  
I do not know

**HBV vaccine usually also protects against HCV (hepatitis C virus).**

True  
False  
I do not know

**HCV vaccine is more effective and safer than HBV vaccine.**

True  
False  
I do not know

## **HBV-related Knowledge Questionnaire With Answers**

**A person with no symptoms of HBV infection cannot infect others.**

True

**False**

I do not know

**There is no laboratory test to distinguish between an acute and chronic HBV infection.**

True

**False**

I do not know

**If a pregnant woman becomes infected with HBV, it is not possible to prevent the transmission of the virus to the baby.**

True

**False**

I do not know

**The symptoms of the disease usually develop 48 hours after the exposure to HBV.**

True

**False**

I do not know

**HBV cannot induce malignant liver disease.**

True

**False**

I do not know

**HBV can be transmitted through a contact (for example, by handshake).**

True

**False**

I do not know

**HBV can be transmitted through contact with open wounds and cuts.**

**True**

False

I do not know

**HBV can be transmitted through infected blood and bodily fluids.**

**True**

False

I do not know

**HBV cannot be transmitted through non-sterile syringes, needles or surgical instruments.**

True

**False**

I do not know

**HBV can be transmitted through sexual contact without protection.**

**True**

False

I do not know

**Vaccination cannot prevent HBV infection.**

True

**False**

I do not know

**There is no laboratory test to prove HBV infection.**

True

**False**

I do not know

**A post-exposure prophylaxis for HBV exists.**

**True**

False

I do not know

**Chronic HBV infection cannot be treated.**

True

**False**

I do not know

**Acute HBV infection is always symptomatic and requires a hospital admission.**

True

**False**

I do not know

**An acute HBV infection always transforms into a chronic infection.**

True

**False**

I do not know

**Younger people are more likely to develop chronic HBV infection after an acute HBV infection, in comparison to older people.**

**True**

False

I do not know

**HBV infection in the first year of life will result in chronic infection in approximately 90% of cases.**

**True**

False

I do not know

**HBV infection in adulthood will result in the development of chronic infection in about 90% of cases.**

True

**False**

I do not know

**HBV can be contracted by using a toothbrush of a person infected with HBV.**

**True**

False

I do not know

**HBV is often transmitted by breastfeeding.**

True

**False**

I do not know

**It is possible to contract HBV by hugging.**

True

**False**

I do not know

**People living with those infected with HBV are at an increased risk of an infection.**

**True**

False

I do not know

**Health care professionals are at greater risk of HBV infection.**

**True**

False

I do not know



**In case of exposure to HBV, it is possible to prevent the development of the infection by vaccination within 24 hours.**

True

False

I do not know

**Once recovered from HBV infection, a person cannot get infected again.**

True

False

I do not know

**There is no effective way to prevent HBV.**

True

False

I do not know

**A vaccine for HBV still doesn't exist.**

True

False

I do not know

**It is dangerous to receive HBV vaccine if someone has been vaccinated previously.**

True

False

I do not know

**After exposure to HBV, a post-exposure prophylaxis can be provided by vaccination or by administration of hepatitis B immunoglobulin.**

True

False

I do not know

**Health care professionals should be tested to determine if they have sufficient immunity to HBV.**

True

False

I do not know

**If insufficient immunity in adulthood has been determined, it is not possible to receive an additional dose of vaccine to develop immunity.**

True

False

I do not know

**HBV vaccine cannot be received at the same time as other vaccines.**

True

**False**

I do not know

**HBV vaccine is the only way to prevent the development of infection after exposure to infected blood.**

True

**False**

I do not know

**HBV vaccine usually also protects against HCV (hepatitis C virus).**

True

**False**

I do not know

**HCV vaccine is more effective and safer than HBV vaccine.**

True

**False**

I do not know

## **HCV-related Knowledge Questionnaire**

**The infection becomes chronic in more than 75% of people infected with HCV.**

- True
- False
- I do not know

**Acute HCV infection usually occurs within 6 months from exposure to HCV.**

- True
- False
- I do not know

**Some people do not develop a chronic form of the HCV infection, even though they have not received any form of therapy.**

- True
- False
- I do not know

**It is not possible to contract HCV by using infected syringes.**

- True
- False
- I do not know

**A mother infected with HCV cannot transmit the infection to a child during a childbirth.**

- True
- False
- I do not know

**It is possible to contract HCV by using an infected toothbrush.**

- True
- False
- I do not know

**It is possible to contract HCV by getting a tattoo.**

- True
- False
- I do not know

**It is not possible to contract HCV through sexual contact.**

- True
- False
- I do not know

**Blood transfusion recipients are at an increased risk of HCV infection.**

- True
- False
- I do not know

**Blood clotting factor recipients are at an increased risk of HCV infection.**

- True
- False
- I do not know

**An HCV infected mother will infect her child during childbirth in more than 50% of cases.**

- True
- False
- I do not know

**It is possible to contract HCV from a bite of the mosquito that previously sucked the blood of an infected person.**

- True
- False
- I do not know

**Symptoms of an acute HCV infection occur 48 hours after the exposure to the virus.**

- True
- False
- I do not know

**Symptoms that appear 10 weeks after the exposure to HCV are considered to be a chronic infection.**

- True
- False
- I do not know

**Most people with an acute HCV infection do not develop symptoms.**

- True
- False
- I do not know

**A person with no symptoms cannot infect others.**

- True
- False
- I do not know

**Chronic HCV infection can induce failure of the liver function, malignant liver disease and death.**

- True
- False
- I do not know

**HCV infection is easily transmitted through breastfeeding, so all infected mothers should refrain from breastfeeding.**

- True
- False
- I do not know

**There is no laboratory test that could detect if someone has been infected with HCV.**

- True
- False
- I do not know

**There is no laboratory test to detect the ongoing HCV infection.**

- True
- False
- I do not know

**HCV antibodies in blood indicate there is an ongoing HCV infection.**

- True
- False
- I do not know

**After exposure to HCV, antibodies usually appear in the blood after 48 hours.**

- True
- False
- I do not know

**A laboratory test for detection of HCV RNA (PCR) is usually positive on the same day a person has been exposed to HCV.**

- True
- False
- I do not know

**In a person with normal liver enzyme values (ALT, AST), the possibility of chronic HCV can be excluded.**

- True
- False
- I do not know

Homolak J et al. (2020) A cross-sectional study of Hepatitis B and Hepatitis C knowledge among dental medicine students at the University of Zagreb - Supplementary Material

**When it comes to acute HCV infection, a targeted therapy is usually not recommended alongside symptomatic treatment.**

True  
False  
I do not know

**A therapy for chronic HCV exists, however only 20% of people are cured.**

True  
False  
I do not know

**The HCV vaccine is as effective as the HBV vaccine.**

True  
False  
I do not know

**In Croatia, every person born after 1993 was vaccinated against HCV.**

True  
False  
I do not know

**In case of exposure to HCV, there is a safe and effective post-exposure prophylaxis.**

True  
False  
I do not know

**Following a needlestick exposure to HCV positive blood, the risk of HCV infection is less than 2%.**

True  
False  
I do not know

## HCV-related Knowledge Questionnaire

The infection becomes chronic in more than 75% of people infected with HCV.

True

False

I do not know

Acute HCV infection usually occurs within 6 months from exposure to HCV.

True

False

I do not know

Some people do not develop a chronic form of the HCV infection, even though they have not received any form of therapy.

True

False

I do not know

It is not possible to contract HCV by using infected syringes.

True

False

I do not know

A mother infected with HCV cannot transmit the infection to a child during a childbirth.

True

False

I do not know

It is possible to contract HCV by using an infected toothbrush.

True

False

I do not know

It is possible to contract HCV by getting a tattoo.

True

False

I do not know

It is not possible to contract HCV through sexual contact.

True

False

I do not know

**Blood transfusion recipients are at an increased risk of HCV infection.**

True

**False**

I do not know

**Blood clotting factor recipients are at an increased risk of HCV infection.**

True

**False**

I do not know

**An HCV infected mother will infect her child during childbirth in more than 50% of cases.**

True

**False**

I do not know

**It is possible to contract HCV from a bite of the mosquito that previously sucked the blood of an infected person.**

True

**False**

I do not know

**Symptoms of an acute HCV infection occur 48 hours after the exposure to the virus.**

True

**False**

I do not know

**Symptoms that appear 10 weeks after the exposure to HCV are considered to be a chronic infection.**

True

**False**

I do not know

**Most people with an acute HCV infection do not develop symptoms.**

**True**

False

I do not know

**A person with no symptoms cannot infect others.**

True

**False**

I do not know



**Chronic HCV infection can induce failure of the liver function, malignant liver disease and death.**

True

False

I do not know

**HCV infection is easily transmitted through breastfeeding, so all infected mothers should refrain from breastfeeding.**

True

False

I do not know

**There is no laboratory test that could detect if someone has been infected with HCV.**

True

False

I do not know

**There is no laboratory test to detect the ongoing HCV infection.**

True

False

I do not know

**HCV antibodies in blood indicate there is an ongoing HCV infection.**

True

False

I do not know

**After exposure to HCV, antibodies usually appear in the blood after 48 hours.**

True

False

I do not know

**A laboratory test for detection of HCV RNA (PCR) is usually positive on the same day a person has been exposed to HCV.**

True

False

I do not know

**In a person with normal liver enzyme values (ALT, AST), the possibility of chronic HCV can be excluded.**

True

False

I do not know

**When it comes to acute HCV infection, a targeted therapy is usually not recommended alongside symptomatic treatment.**

True

False

I do not know

**A therapy for chronic HCV exists, however only 20% of people are cured.**

True

False

I do not know

**The HCV vaccine is as effective as the HBV vaccine.**

True

False

I do not know

**In Croatia, every person born after 1993 was vaccinated against HCV.**

True

False

I do not know

**In case of exposure to HCV, there is a safe and effective post-exposure prophylaxis.**

True

False

I do not know

**Following a needlestick exposure to HCV positive blood, the risk of HCV infection is less than 2%.**

True

False

I do not know

Supplementary material 1

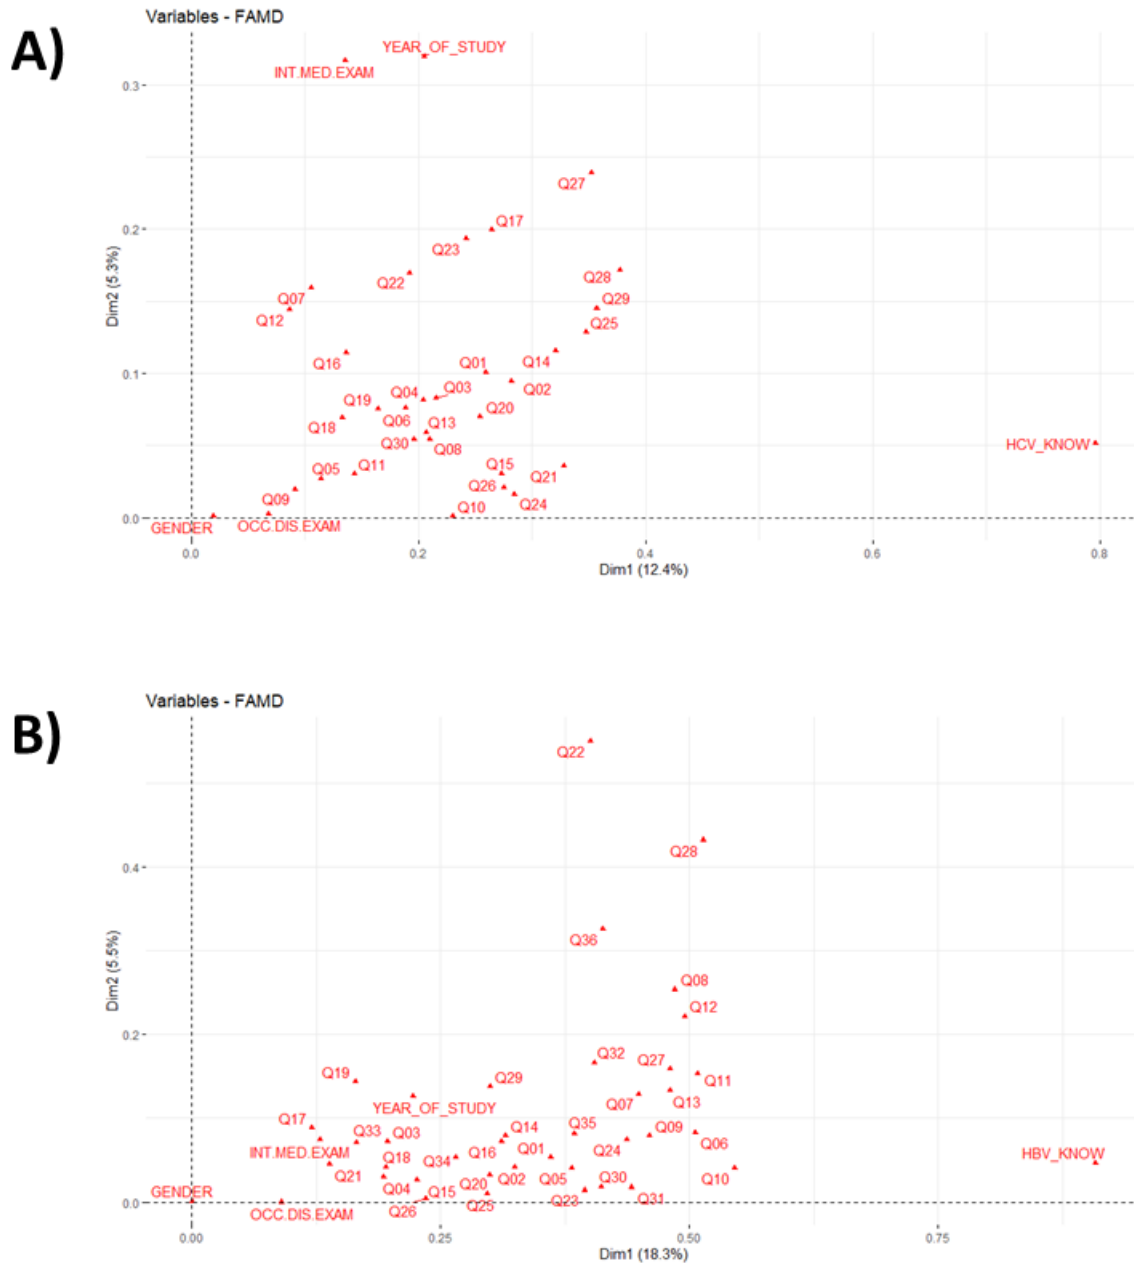

**Fig 1.** Factor analysis of mixed data conducted on all questions from the HCV- and HBV-related knowledge questionnaire, overall knowledge score and the information of year of study, gender, and Internal Medicine and Occupational Diseases in Dentistry course completion. **A)** Graph of variables for the HCV-related knowledge questionnaire. **B)** Graph of variables for the HBV-related knowledge questionnaire.

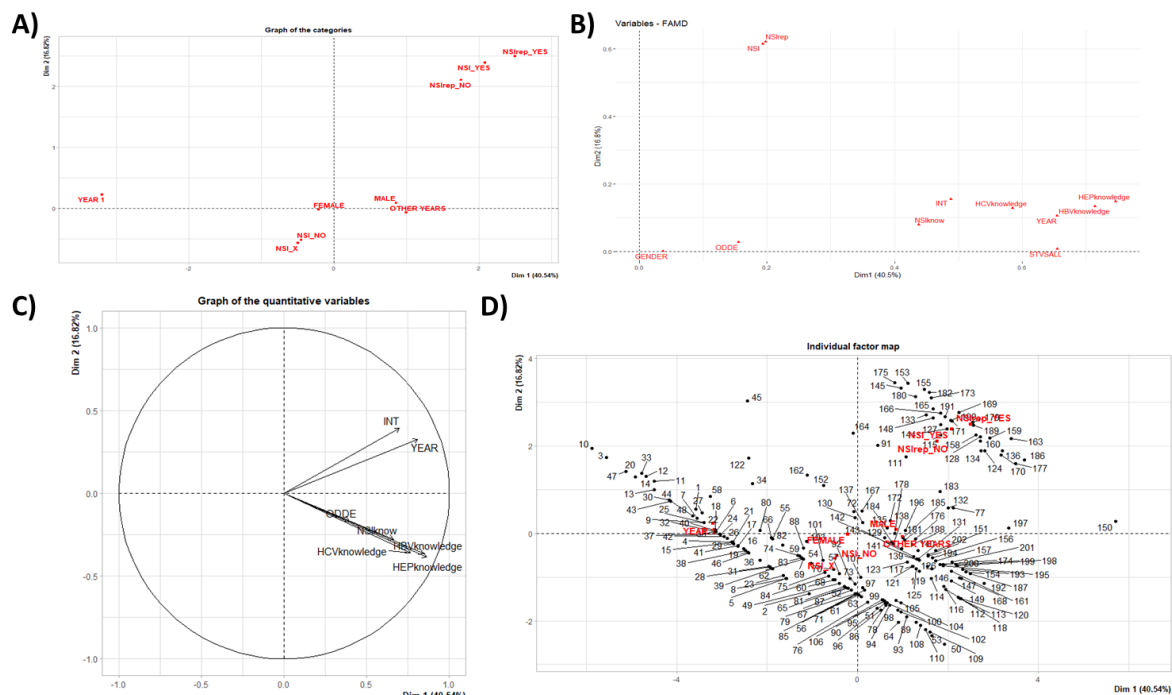

**Fig 2.** Factor analysis of mixed data for categorical and quantitative variables. **A)** Graph of categories representing spatial relationship of variables in the context of the first and second informational dimension. **B)** A graph of variables demonstrating spatial relationship of both quantitative and categorical variables in the context of first two informational dimensions. **C)** Primary component analysis of quantitative variables. **D)** Graph of individual students in regards to the descriptive categorical information. **YEAR1** – 1<sup>st</sup> year students; **OTHER YEARS**- students enrolled in all other years; **NSI\_X/NSI\_NO** – students who didn’t sustain a needlestick injury; **NSI\_YES** – students who sustained a needlestick injury; **NSIrep\_YES** – students who sustained and reported a needlestick injury; **NSIrep\_NO** – students who sustained, but didn’t report a needlestick injury; **INT** – Internal Medicine Exam; **ODDE** – Occupational Diseases in Dentistry Exam; **NSI\_knowledge** – needlestick injury-related knowledge; **HEPknowledge** – overall hepatitis-related knowledge.
